# Supplementary material for: Synthesis of porous hollow Fe3O4 beads and their applications in lithium ion batteries
Source: Royal Society of Chemistry journal article supplement (doi:10.1039/c2jm15440d), 2012-01-01
Supplement: c2jm15440d.pdf [file c2jm15440d.pdf]

Supporting Information for:

## Synthesis of Porous Hollow Fe<sub>3</sub>O<sub>4</sub> Beads and Their Applications in Lithium Ion Batteries

Yu Chen<sup>#</sup>, Hui Xia<sup>&</sup>, Li Lu<sup>&</sup> and Junmin Xue<sup>#\*</sup>

<sup>#</sup>Department of Materials Science and Engineering, <sup>&</sup>Department of Mechanical Engineering, National University of Singapore, Singapore, 117576

\*Corresponding author: msexuejm@nus.edu.sg

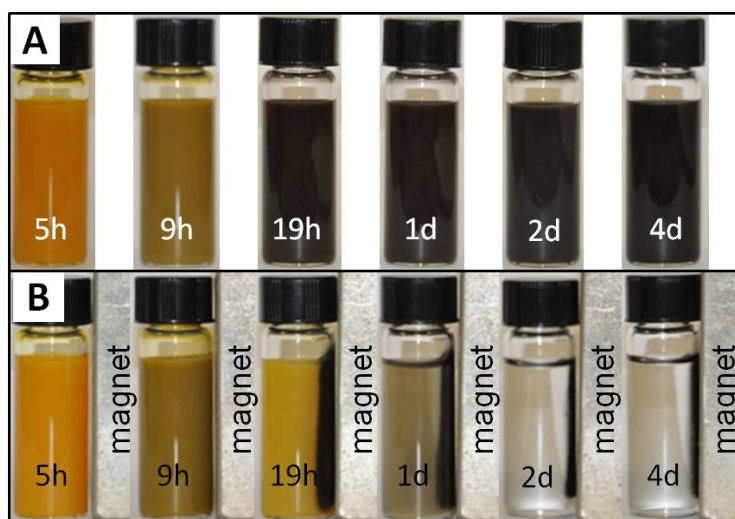

Figure S1. Digital images of (A) products in ethanol obtained at different reaction intervals, and (B) products in ethanol obtained at different reaction intervals under a magnetic field.

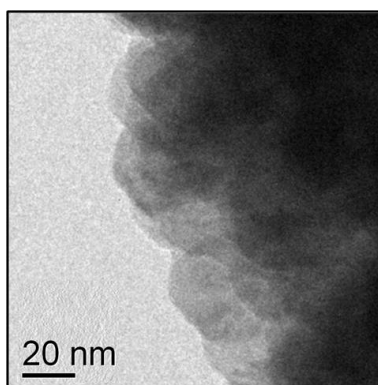

Figure S2. TEM images of the surface of a bare  $\text{Fe}_3\text{O}_4$  bead.

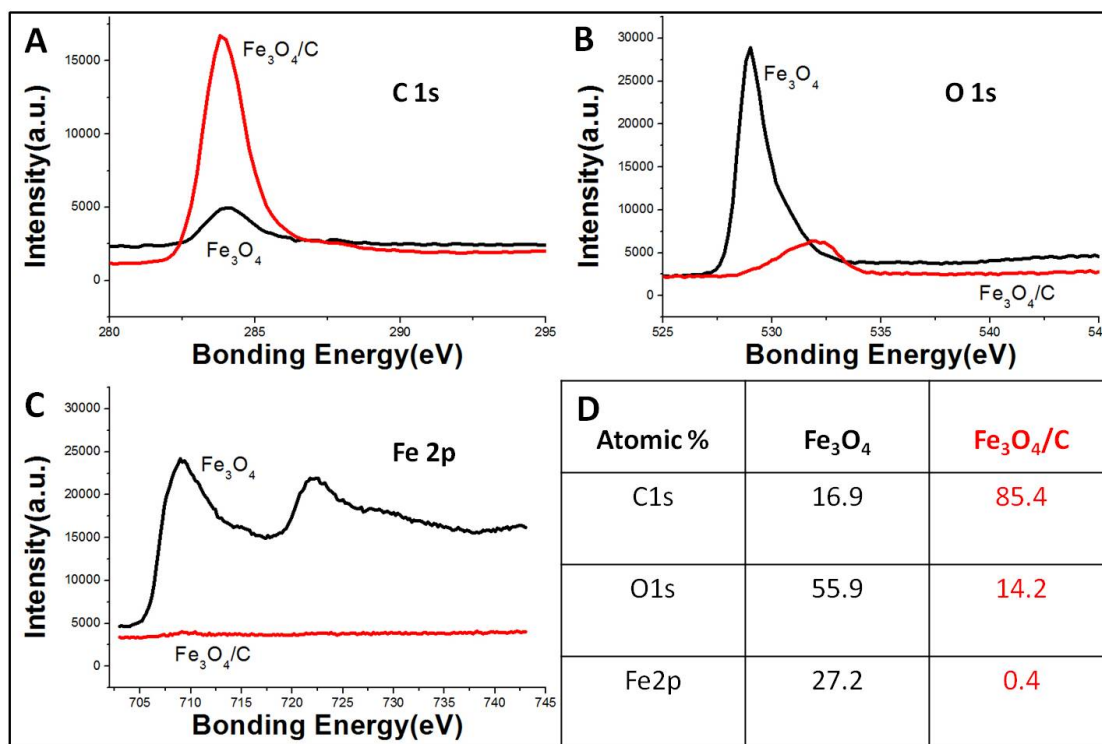

Figure S3. XPS spectra of (A) C 1s, (B) O 1s and (C) Fe 2p of bare  $\text{Fe}_3\text{O}_4$  beads (black lines) and  $\text{Fe}_3\text{O}_4/\text{C}$  beads (red lines). (D) Relative atomic percentage for  $\text{Fe}_3\text{O}_4$  and  $\text{Fe}_3\text{O}_4/\text{C}$  beads.

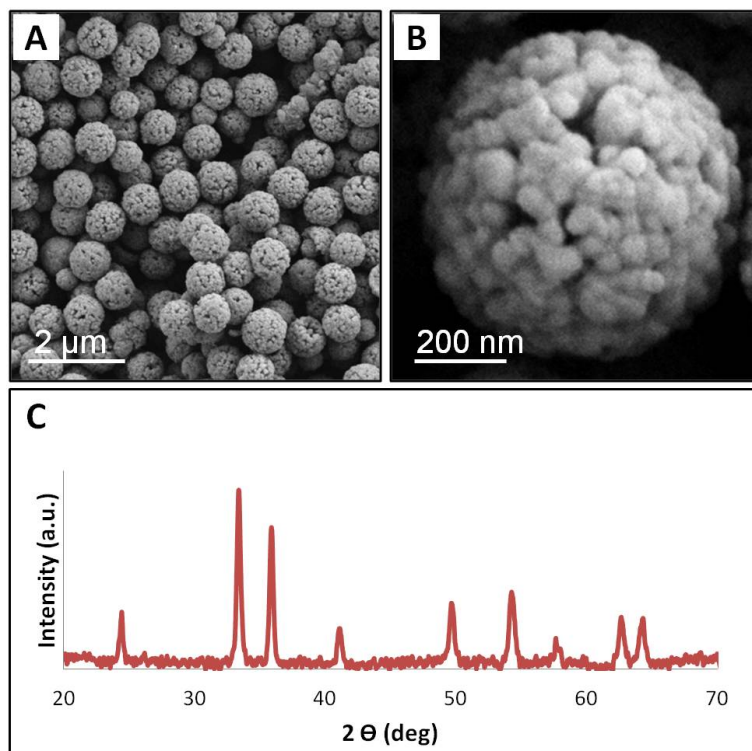

Figure S4. (A, B) SEM images and (C) corresponding XRD pattern of the as-obtained  $\alpha$ -Fe<sub>2</sub>O<sub>3</sub> beads.

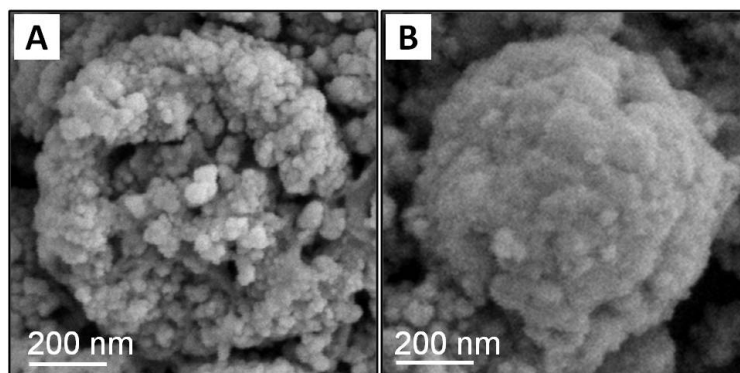

Figure S5. (A) The typical morphology of a broken Fe<sub>3</sub>O<sub>4</sub> bead and (B) an intact Fe<sub>3</sub>O<sub>4</sub>/C bead found after 50 cycles of charging/discharging.
